# Supplementary material for: An assessment of aerosol optical properties from remote-sensing observations and regional chemistry–climate coupled models over Europe
Source: Copernicus journal article supplement (doi:10.5194/acp-18-5021-2018), 2018-04-12
Supplement: Supplementary file 1 [file acp-18-5021-2018-supplement.pdf]

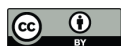

*Supplement of*

## **An assessment of aerosol optical properties from remote-sensing observations and regional chemistry–climate coupled models over Europe**

**Laura Palacios-Peña et al.**

*Correspondence to:* Pedro Jiménez-Guerrero ([pedro.jimenezguerrero@um.es](mailto:pedro.jimenezguerrero@um.es))

The copyright of individual parts of the supplement might differ from the CC BY 4.0 License.

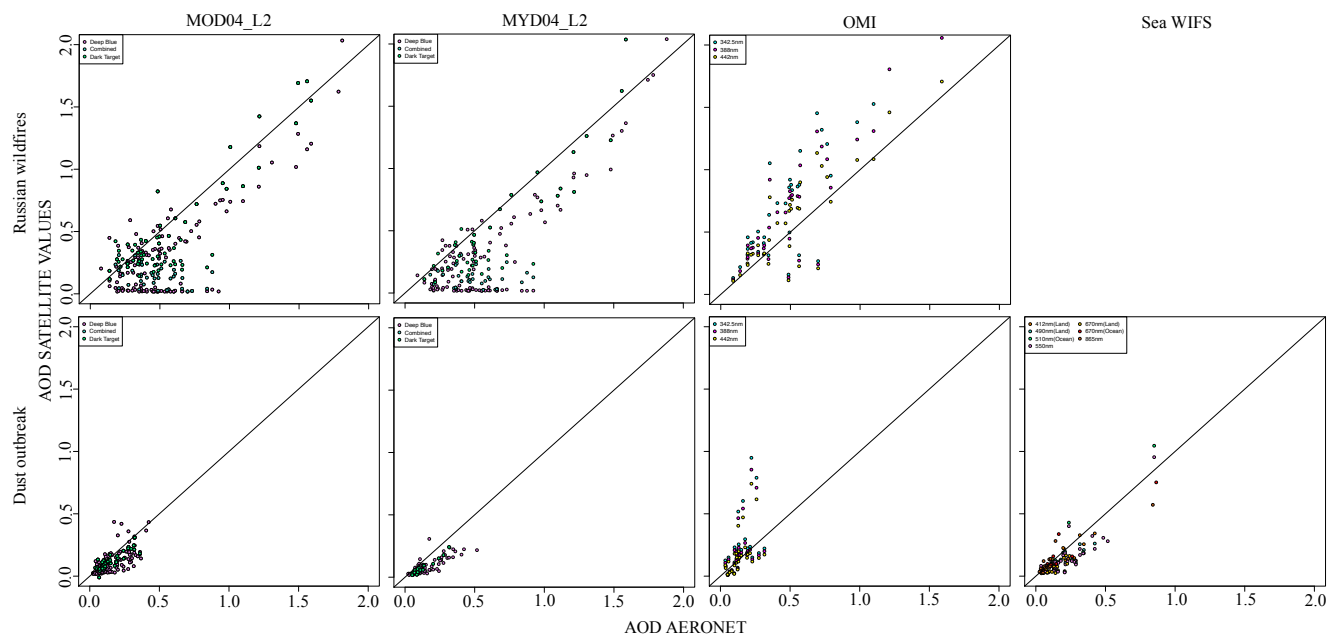

**Figure S1.** Satellite-AERONET linear regression. Russian wildfires case (top) and Saharan dust outbreak case (bottom). AOD from MOD04\_L2 and MYD04\_L2 at 550nm. For OMI and Sea WIFS AOD at indicated wavelength.

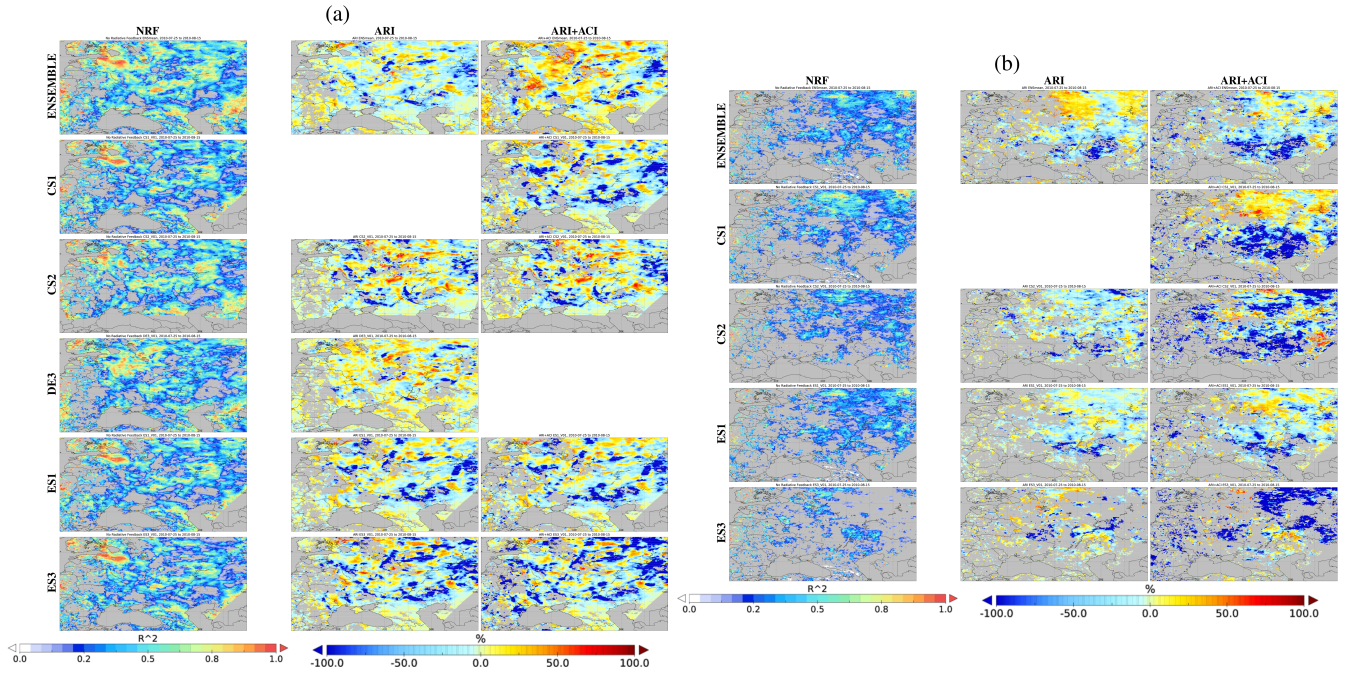

**Figure S2.** Determination coefficient for the NRF simulations (first column) and their improvements due to ARI (second) and ARI+ACI (third) of the model-MODIS comparison of AOD at  $550nm$  (left) and AE between  $412/470nm$  (right) for the Russian wildfires case.

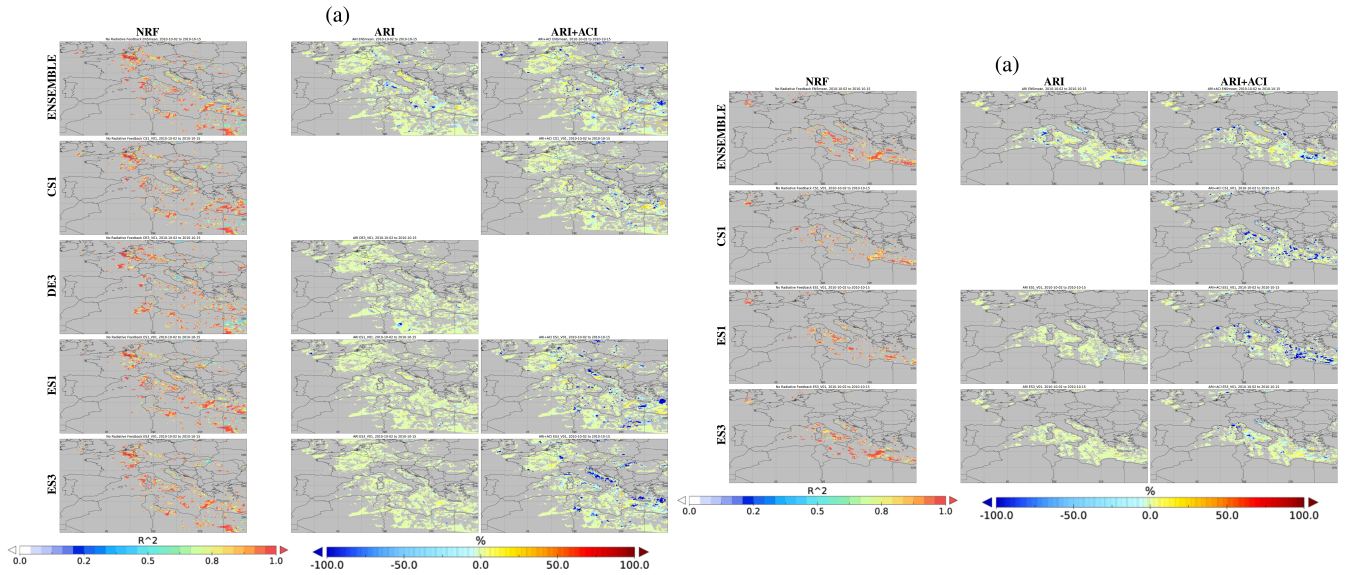

**Figure S3.** Determination coefficient for the NRF simulations (first column) and their improvements due to ARI (second) and ARI+ACI (third) of the model-MODIS comparison of AOD at  $550nm$  (left) and AE between  $550/860nm$  (right) for the Sahara desert dust outbreak case.
